# Supplementary material for: Divergent Outcomes in Cognitive-Behavioral Therapy and Pharmacotherapy for Adult Depression
Source: Atypon-hosted journal article supplement (doi:10.1176/appi.ajp.2015.15040492), 2016-02-12
Supplement: appi.ajp.2015.15040492.ds001.pdf [file appi.ajp.2015.15040492.ds001.pdf]

TABLE S1

*Randomized Clinical Trials Contributing Data to Individual Patient Meta-Analysis*

| Trial           | Target group                    | Diagnosis | Measures   | Pharmacotherapy |          | Cognitive-behavioral therapy |            |          |       | Country |         |
|-----------------|---------------------------------|-----------|------------|-----------------|----------|------------------------------|------------|----------|-------|---------|---------|
|                 |                                 |           | available  | Compound        | <i>n</i> | Weeks                        | Format     | <i>n</i> | Weeks |         | Details |
| David, 2008     | adults with MDD                 | A, B, C   | BDI        | fluoxetine      | 57       | 14                           | individual | 113      | 14    | 1, 2, 3 | Romania |
| DeRubeis, 2005  | adults with MDD                 | A, B, C   | HAM-D, BDI | paroxetine      | 120      | 16                           | individual | 60       | 16    | 1, 2, 3 | US      |
| Dimidjian, 2006 | adults with MDD                 | A, B      | HAM-D, BDI | paroxetine      | 100      | 16                           | individual | 45       | 16    | 1, 2, 3 | US      |
| Dunlop, 2012    | adults with MDD                 | A, B      | HAM-D, BDI | escitalopram    | 39       | 12                           | individual | 41       | 12    | 2       | US      |
| Dunner, 1996    | adults with dysthymic disorder  | A, B, C   | HAM-D, BDI | fluoxetine      | 13       | 16                           | individual | 11       | 16    | 1, 2, 3 | US      |
| Elkin, 1989     | adults with MDD                 | A, B      | HAM-D, BDI | imipramine      | 57       | 16                           | individual | 59       | 16    | 1, 2, 3 | US      |
| Faramarzi, 2008 | infertile women with MDD        | A, B, C   | BDI        | fluoxetine      | 30       | 10                           | group      | 29       | 10    | 2       | Iran    |
| Hegerl, 2010    | depressed primary care patients | A, B, C   | HAM-D, BDI | sertraline      | 83       | 10                           | group      | 61       | 10    | 1, 2, 3 | Germany |
| Hollon, 1992    | adults with MDD                 | A, B, C   | HAM-D, BDI | imipramine      | 57       | 12                           | individual | 25       | 12    | 1, 2, 3 | US      |
| Jarrett, 1999   | adults with atypical MDD        | A, B, C   | HAM-D, BDI | phenelzine      | 36       | 10                           | individual | 36       | 10    | 1, 2, 3 | US      |
| Kennedy, 2007   | adults with MDD                 | A, B      | HAM-D      | venlafaxine     | 14       | 16                           | individual | 17       | 16    | 1, 2, 3 | Canada  |
| Miranda, 2003   | low-income women with MDD       | A, B      | HAM-D      | paroxetine      | 88       | 24                           | either     | 90       | 8     | 2, 3    | US      |
| Mohr, 2001      | MS patients with MDD            | A, B      | HAM-D, BDI | sertraline      | 22       | 16                           | individual | 22       | 16    | 2, 3    | US      |
| Murphy, 1984    | adults with MDD                 | A, B      | HAM-D, BDI | nortriptyline   | 16       | 12                           | individual | 17       | 12    | 2, 3    | US      |
| Rush, 1977      | adults with MDD                 | A, B, C   | HAM-D, BDI | imipramine      | 22       | 12                           | individual | 19       | 12    | 2, 3    | US      |
| Segal, 2006     | adults with MDD                 | A, B      | HAM-D, BDI | citalopram      | 152      | 26                           | individual | 149      | 22-24 | 1, 2, 3 | Canada  |

*Note.* MDD = major depressive disorder. MS = multiple sclerosis. HAM-D = Hamilton Rating Scale for Depression. BDI = Beck Depression Inventory. Diagnostic details reported in cited trial publication: A = diagnoses based on *DSM* (III, III-R, or IV), Research Diagnostic Criteria, or Feighner Criteria; B = diagnosis informed by a semi-structured or structured interview; C = diagnosis made and/or confirmed by doctoral-level clinician, psychologist, or psychiatrist. Cognitive-behavioral therapy (CBT) details reported in cited trial publication: 1 = therapists had at least one year of experience in providing CBT and/or met standardized CBT competence criteria; 2 = CBT based on a written treatment manual; 3 = therapists received CBT supervision/feedback during clinical trial.

*References for Clinical Trial Publications*

- David D, Szentagotai A, Lupu V, Cosman D. Rational emotive behavior therapy, cognitive therapy, and medication in the treatment of major depressive disorder: a randomized clinical trial, posttreatment outcomes, and six-month follow-up. *J Clin Psychol* 2008; 64:728-746
- DeRubeis RJ, Hollon SD, Amsterdam JD, Shelton RC, Young PR, Salomon RM ... Gallop R. Cognitive therapy vs medications in the treatment of moderate to severe depression. *Arch Gen Psychiatry* 2005; 62:417-422
- Dimidjian S, Hollon SD, Dobson KS, Schmaling KB, Kohlenberg RJ, Addis ME ... Jacobson, NS. Randomized trial of behavioral activation, cognitive therapy, and antidepressant medication in the acute treatment of adults with major depression. *J Consult Clin Psychol* 2006; 74:658-670
- Dunlop B, Kelley M, Mletzko T, Velasquez C, Craighead W, Mayberg H. Depression beliefs, treatment preference, and outcomes in a randomized trial for major depressive disorder. *J Psychiatr Res* 2012; 46:375-381
- Dunner D, Schmaling K, Hendrickson H, Becker J, Lehman A, Bea C. Cognitive therapy versus fluoxetine in the treatment of dysthymic disorder. *Depression* 1996; 4:34-41
- Elkin I, Shea MT, Watkins JT, Imber SD, Sotsky SM, Collins JF... Parloff MB. National Institute of Mental Health Treatment of Depression Collaborative Research Program: General effectiveness of treatments. *Arch Gen Psychiatry* 1989; 46:971-982
- Faramarzi M, Alipor A, Esmaelzadeh S, Kheirkhah F, Poladi K, Pash H. Treatment of depression and anxiety in infertile women: Cognitive behavioral therapy versus fluoxetine. *J Affect Disord* 2008; 108: 159-164
- Hegerl U, Hautzinger M, Mergl R, Kohnen, R, Schütze M, Scheunemann W ... Henkel V. Effects of pharmacotherapy and psychotherapy in depressed primary-care patients: A randomized, controlled trial including a patients' choice arm. *Int J Neuropsychopharmacol* 2010; 13:31-44
- Hollon S, DeRubeis R, Evans M, Wiemer M, Garvey M, Grove W, Tuason V. Cognitive therapy and pharmacotherapy for depression. Singly and in combination. *Arch Gen Psychiatry* 1992; 49:774-781
- Jarrett RB, Schaffer M, McIntire D, Witt-Browder A, Kraft D, Risser RC (1999). Treatment of atypical depression with cognitive therapy or phenelzine: a double-blind, placebo-controlled trial. *Arch Gen Psychiatry* 1999; 56:431-437
- Kennedy S, Konarski J, Segal Z, Lau M, Bieling P, McIntyre R, Mayberg H. Differences in brain glucose metabolism between responders to CBT and venlafaxine in a 16-week randomized controlled trial. *Am J Psychiatry* 2007; 164:778-788
- Miranda J, Chung JY, Green BL, Krupnick J, Siddique J, Revicki DA, Belin T. Treating depression in predominantly low-income young minority women: A randomized controlled trial. *JAMA* 2003; 290:57-65

Mohr D, Boudewyn A, Goodkin D, Bostrom A, Epstein L. Comparative outcomes for individual cognitive-behavior therapy, supportive-expressive group psychotherapy, and sertraline for the treatment of depression in multiple sclerosis. *J Consult Clin Psychol* 2001; 69:942-949

Murphy G, Simons A, Wetzel R, Lustman P. Cognitive therapy and pharmacotherapy. Singly and together in the treatment of depression. *Arch Gen Psychiatry* 1984; 41:33-41

Rush AJ, Beck AT, Kovacs M, Hollon SD. Comparative efficacy of cognitive therapy and pharmacotherapy in the treatment of depressed outpatients. *Cognit Ther Res* 1977; 1:17-37

Segal Z, Kennedy S, Gemar M, Hood K, Pedersen R, Buis T. Cognitive reactivity to sad mood provocation and the prediction of depressive relapse. *Arch Gen Psychiatry* 2006; 63:749-755

Figure S1

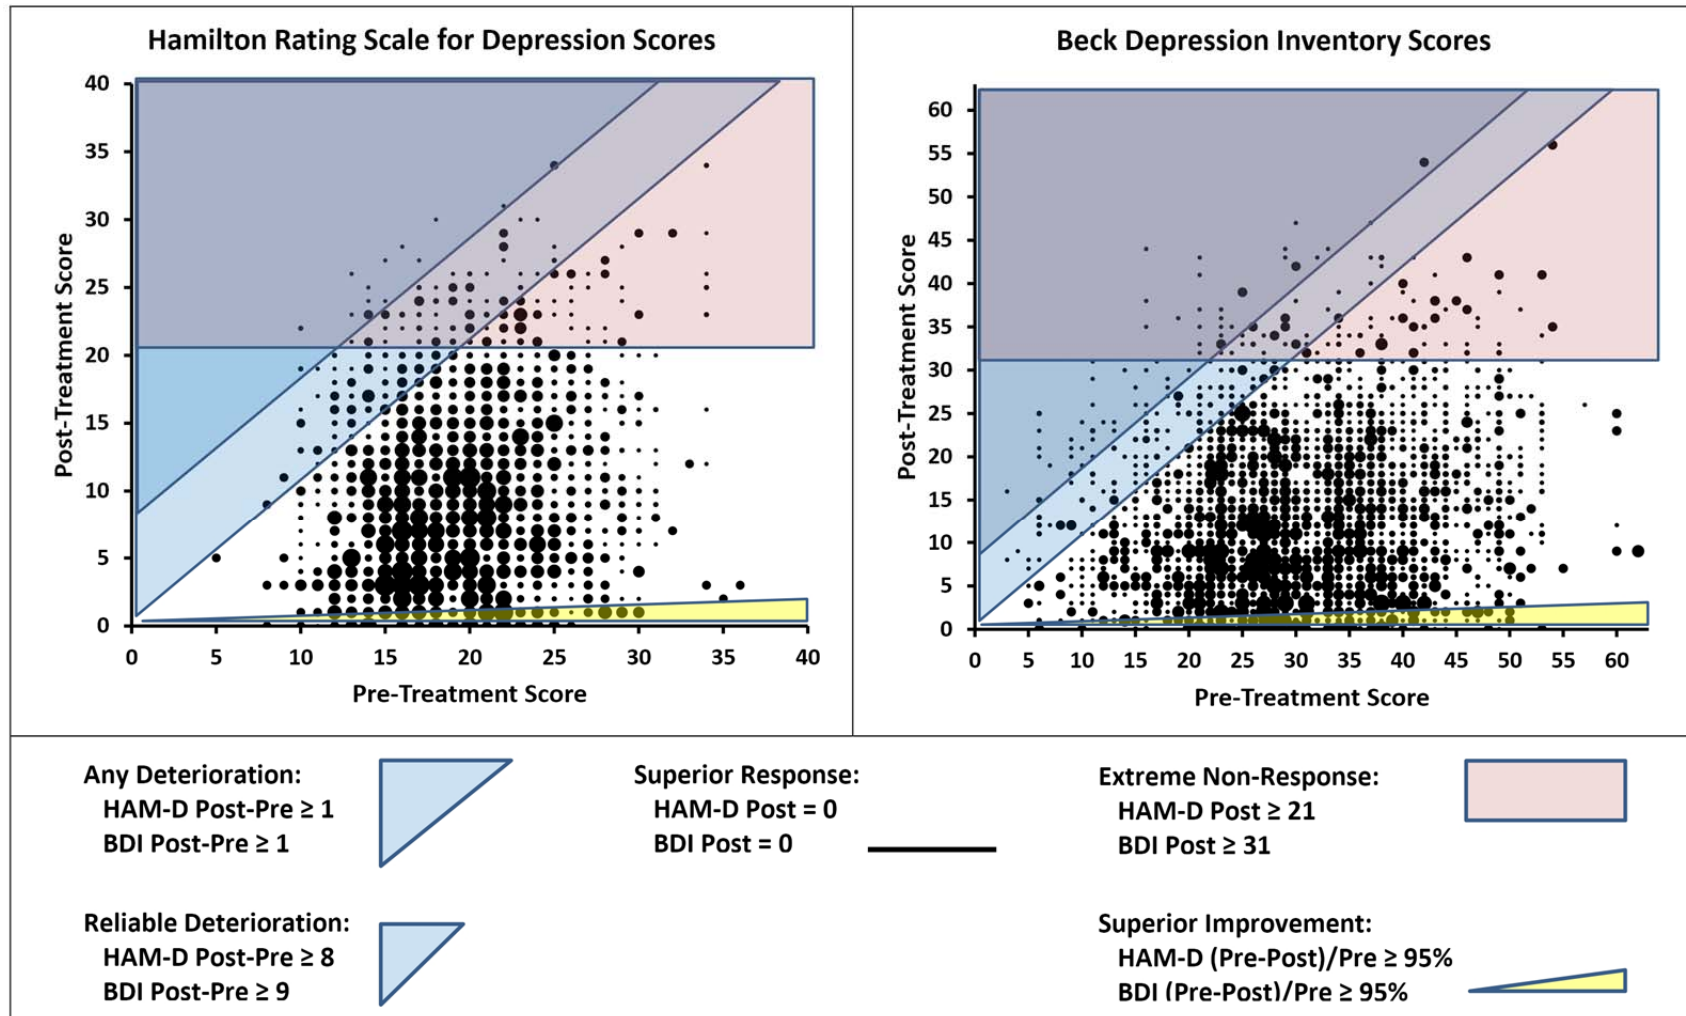

Depressive symptom severity before and after pharmacotherapy. Larger dots represent more patients. Plotted data include imputation of missing values. HAM-D = Hamilton Rating Scale for Depression. BDI = Beck Depression Inventory-II.

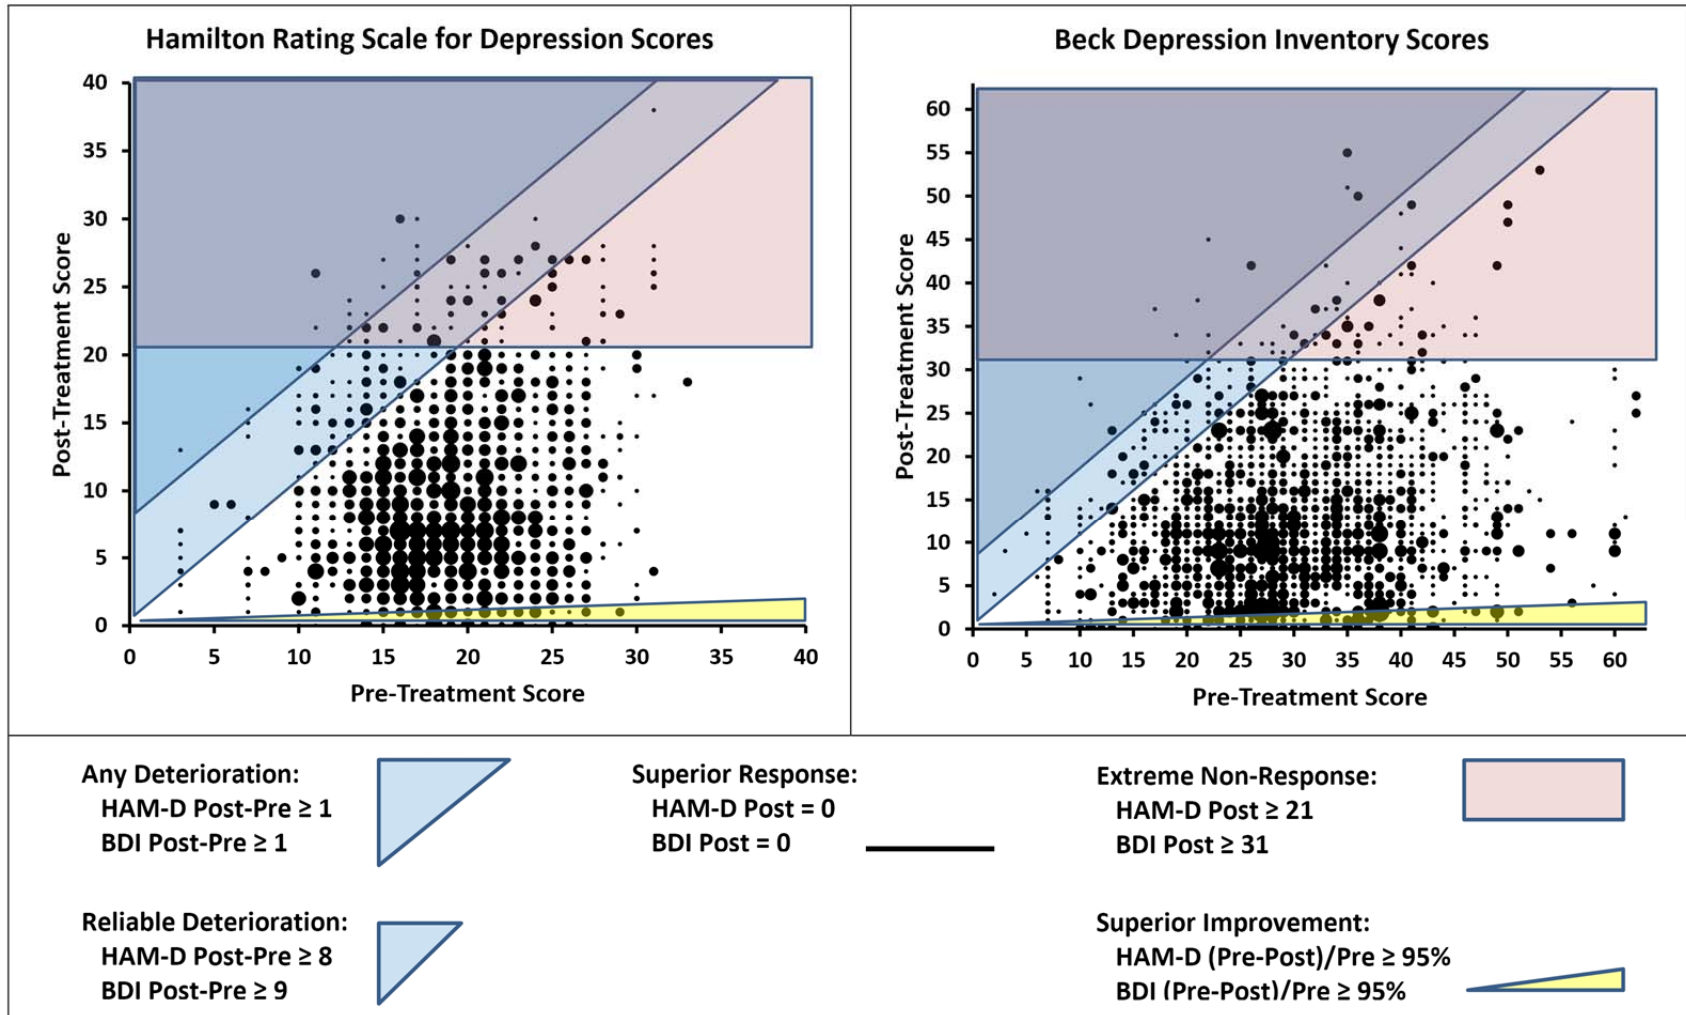

Depressive symptom severity before and after cognitive behavioral therapy. Larger dots represent more patients. Plotted data include imputation of missing values. HAM-D = Hamilton Rating Scale for Depression. BDI = Beck Depression Inventory-II.

TABLE S2

*Negative Outcomes and Unusually-Positive Outcomes in Clinical Trials with Pill Placebo Arms*

| Outcome                        | Pill placebo |            | Cognitive-behavioral therapy |            | Pharmacotherapy |            | Treatment difference |
|--------------------------------|--------------|------------|------------------------------|------------|-----------------|------------|----------------------|
|                                | Est. %       | 95% CI     | Est. %                       | 95% CI     | Est. %          | 95% CI     | <i>p</i>             |
| Negative Outcomes              |              |            |                              |            |                 |            |                      |
| Any Deterioration              |              |            |                              |            |                 |            |                      |
| HAM-D                          | 14.0         | 8.5, 22.1  | 11.2                         | 6.5, 18.8  | 10.2            | 6.1, 16.5  | .339                 |
| BDI                            | 12.1         | 7.3, 19.5  | 10.3                         | 5.9, 17.4  | 6.2             | 3.4, 11.2  | .056                 |
| Reliable Deterioration         |              |            |                              |            |                 |            |                      |
| HAM-D                          | 1.5          | 0.5, 4.3   | 1.4                          | 0.3, 5.5   | 1.0             | 0.3, 3.2   | .875                 |
| BDI                            | 1.7          | 0.4, 5.9   | 1.5                          | 0.4, 5.1   | 1.5             | 0.5, 4.9   | .990                 |
| Extreme Non-response           |              |            |                              |            |                 |            |                      |
| HAM-D                          | 11.0         | 7.6, 15.6  | 7.2                          | 4.3, 11.8  | 7.4             | 4.9, 11.0  | .252                 |
| BDI                            | 10.4         | 5.6, 18.4  | 8.4                          | 4.5, 15.2  | 6.2             | 3.1, 11.9  | .201                 |
| Any Negative Outcome           | 24.8         | 17.7, 33.5 | 21.3                         | 14.6, 29.9 | 16.2            | 11.2, 22.9 | .046                 |
| Unusually-Positive Outcomes    |              |            |                              |            |                 |            |                      |
| Superior Improvement           |              |            |                              |            |                 |            |                      |
| HAM-D                          | 1.6          | 0.5, 4.8   | 1.9                          | 0.7, 5.4   | 4.3             | 2.0, 9.1   | .090                 |
| BDI                            | 6.8          | 3.3, 13.2  | 6.8                          | 3.3, 13.5  | 7.9             | 4.1, 14.6  | .838                 |
| Superior Response              |              |            |                              |            |                 |            |                      |
| HAM-D                          | 1.7          | 0.6, 4.8   | 1.5                          | 0.5, 4.6   | 2.5             | 1.1, 5.8   | .645                 |
| BDI                            | 4.4          | 1.9, 9.7   | 4.5                          | 2.0, 9.9   | 5.1             | 2.4, 10.6  | .906                 |
| Any Unusually-Positive Outcome | 6.9          | 3.4, 13.3  | 7.1                          | 3.5, 13.9  | 10.3            | 5.6, 18.4  | .225                 |

*Note.* Est. = estimated proportion of patients derived from multilevel logistic regression models that adjusted for the random effect of study. Analyses included multiple imputation of missing HAM-D (Hamilton Rating Scale for Depression) and BDI (Beck Depression Inventory-II) scores. Any deterioration and reliable deterioration, respectively, are increases of  $\geq 1$  and  $\geq 8$  points on the HAM-D, and  $\geq 1$  and  $\geq 9$  points on the BDI, from pre- to post-treatment. Extreme non-response is post-treatment HAM-D  $\geq 21$  or BDI  $\geq 31$ . Superior improvement is  $\geq 95\%$  reduction in HAM-D or BDI scores from pre- to post-treatment. Superior response is a post-treatment HAM-D or BDI = 0. Any negative outcome is deterioration and/or extreme non-response, and any unusually-positive outcome is superior improvement and/or superior response on either measure. Five studies each used the HAM-D and BDI and included pill placebo arms (DeRubeis, 2005; Dimidjian, 2006; Elkin, 1989; Hegerl, 2010; Jarrett, 1999). Two trials (DeRubeis, 2005; Dimidjian, 2006) used 8-week placebo conditions, and results tabled here reflect 8-week outcomes in these trials.  $N = 951$ .

TABLE S3

*Prediction of Deterioration and Extreme Non-Response in Cognitive Behavioral Therapy and Pharmacotherapy*

| Model                       | Any Deterioration |           |          |           | Reliable Deterioration |           |          |           | Extreme Non-response |           |          |           |
|-----------------------------|-------------------|-----------|----------|-----------|------------------------|-----------|----------|-----------|----------------------|-----------|----------|-----------|
|                             | HAM-D             |           | BDI      |           | HAM-D                  |           | BDI      |           | HAM-D                |           | BDI      |           |
|                             | <i>B</i>          | <i>SE</i> | <i>B</i> | <i>SE</i> | <i>B</i>               | <i>SE</i> | <i>B</i> | <i>SE</i> | <i>B</i>             | <i>SE</i> | <i>B</i> | <i>SE</i> |
| 1. Intercept                | -2.57*            | 0.23      | -2.90*   | 0.23      | -4.78*                 | 0.39      | -4.52*   | 0.43      | -2.87*               | 0.19      | -3.10*   | 0.22      |
| Treatment                   | 0.08              | 0.11      | 0.04     | 0.14      | 0.33                   | 0.33      | -0.27    | 0.30      | -0.02                | 0.12      | 0.06     | 0.13      |
| 2. Female gender            | -0.07             | 0.13      | 0.01     | 0.14      | 0.23                   | 0.39      | -0.11    | 0.33      | 0.06                 | 0.14      | -0.17    | 0.13      |
| Treatment * gender          | 0.15              | 0.11      | -0.02    | 0.12      | n/a                    | n/a       | -0.16    | 0.29      | 0.04                 | 0.14      | -0.05    | 0.12      |
| 3. Age (years)              | -0.05             | 0.12      | 0.02     | 0.14      | -0.64                  | 0.41      | -0.03    | 0.34      | -0.11                | 0.14      | 0.02     | 0.15      |
| Treatment * age             | -0.05             | 0.11      | -0.02    | 0.15      | 0.01                   | 0.42      | -0.31    | 0.32      | -0.18                | 0.13      | 0.02     | 0.13      |
| 4. Minority status          | 0.08              | 0.15      | -0.16    | 0.17      | -0.17                  | 0.38      | -0.06    | 0.34      | -0.02                | 0.16      | -0.18    | 0.16      |
| Treatment * minority        | -0.10             | 0.13      | -0.11    | 0.16      | n/a                    | n/a       | n/a      | n/a       | -0.07                | 0.17      | -0.06    | 0.18      |
| 5. Education (>12 years)    | 0.09              | 0.17      | -0.01    | 0.17      | -0.12                  | 0.44      | 0.10     | 0.40      | -0.22                | 0.15      | -0.04    | 0.16      |
| Treatment * education       | -0.17             | 0.16      | -0.02    | 0.16      | 0.14                   | 0.41      | -0.18    | 0.42      | -0.03                | 0.15      | 0.25     | 0.16      |
| 6. Employed full time       | -0.08             | 0.13      | -0.19    | 0.16      | -0.48                  | 0.39      | -0.47    | 0.38      | -0.12                | 0.14      | 0.04     | 0.15      |
| Treatment * employed        | 0.01              | 0.14      | -0.01    | 0.16      | n/a                    | n/a       | -0.15    | 0.38      | -0.12                | 0.14      | 0.03     | 0.14      |
| 7. Double depression        | 0.05              | 0.14      | -0.07    | 0.20      | 0.08                   | 0.42      | n/a      | n/a       | -0.16                | 0.21      | -0.40    | 0.31      |
| Treatment * double depress. | -0.20             | 0.13      | -0.02    | 0.19      | n/a                    | n/a       | n/a      | n/a       | n/a                  | n/a       | -0.01    | 0.25      |
| 8. Comorbid diagnosis       | 0.14              | 0.14      | 0.17     | 0.16      | 0.28                   | 0.36      | 0.25     | 0.40      | 0.14                 | 0.14      | 0.11     | 0.17      |
| Treatment * comorbid        | 0.10              | 0.11      | 0.04     | 0.15      | -0.14                  | 0.36      | 0.10     | 0.42      | 0.04                 | 0.13      | -0.11    | 0.16      |
| 9. Pre-treatment HAM-D      | -0.65*            | 0.13      | -0.06    | 0.14      | -0.90*                 | 0.35      | 0.07     | 0.34      | 0.63*                | 0.14      | 0.38*    | 0.14      |
| Treatment * HAM-D           | -0.01             | 0.12      | -0.06    | 0.14      | -0.20                  | 0.35      | 0.05     | 0.30      | -0.01                | 0.12      | -0.11    | 0.14      |
| 10. Pre-treatment BDI       | -0.19             | 0.16      | -0.91*   | 0.15      | -0.42                  | 0.42      | -0.78*   | 0.38      | 0.50*                | 0.19      | 0.81*    | 0.15      |
| Treatment * BDI             | 0.05              | 0.13      | 0.01     | 0.15      | 0.50                   | 0.41      | 0.18     | 0.37      | 0.26                 | 0.15      | 0.07     | 0.15      |

*Note.* Estimates derived from multilevel logistic regression models adjusting for the random effect of study. Analyses included multiple imputation of missing HAM-D (Hamilton Rating Scale for Depression) and BDI (Beck Depression Inventory-II) scores. Models 2-10 include an intercept and the main effect of treatment (cognitive behavioral therapy versus pharmacotherapy), which are not shown. Any deterioration and reliable deterioration, respectively, are increases of  $\geq 1$  and  $\geq 8$  points on the HAM-D, and  $\geq 1$  and  $\geq 9$  points on the BDI, from pre- to post-treatment. Extreme non-response is post-treatment HAM-D  $\geq 21$  or BDI  $\geq 31$ . Tabled coefficients reflect standardization of predictor variables ( $M=0$ ,  $SD=1$ ) before analysis to minimize collinearity between main effects and interactions. n/a = outcome events were too rare in some predictor categories and combinations for models to converge. \*  $p < .05$ , two-tailed.

*Prediction of Superior Improvement and Superior Response in Cognitive Behavioral Therapy and Pharmacotherapy*

| Model                       | Superior Improvement |           |          |           | Superior Response |           |          |           |
|-----------------------------|----------------------|-----------|----------|-----------|-------------------|-----------|----------|-----------|
|                             | HAM-D                |           | BDI      |           | HAM-D             |           | BDI      |           |
|                             | <i>B</i>             | <i>SE</i> | <i>B</i> | <i>SE</i> | <i>B</i>          | <i>SE</i> | <i>B</i> | <i>SE</i> |
| 1. Intercept                | -2.72*               | 0.20      | -2.22*   | 0.23      | -3.23*            | 0.22      | -2.88*   | 0.30      |
| Treatment                   | -0.25*               | 0.12      | -0.10    | 0.10      | -0.18             | 0.15      | -0.17    | 0.12      |
| 2. Female gender            | 0.08                 | 0.13      | 0.15     | 0.10      | 0.01              | 0.15      | -0.10    | 0.12      |
| Treatment * gender          | -0.10                | 0.12      | -0.03    | 0.10      | -0.09             | 0.15      | -0.01    | 0.12      |
| 3. Age (years)              | -0.31*               | 0.14      | -0.12    | 0.11      | -0.20             | 0.17      | -0.03    | 0.14      |
| Treatment * age             | 0.02                 | 0.13      | 0.06     | 0.11      | 0.02              | 0.16      | 0.11     | 0.13      |
| 4. Minority status          | -0.08                | 0.14      | 0.09     | 0.09      | -0.14             | 0.19      | 0.17     | 0.11      |
| Treatment * minority        | n/a                  | n/a       | 0.05     | 0.09      | n/a               | n/a       | 0.10     | 0.11      |
| 5. Education (>12 years)    | -0.11                | 0.13      | 0.22     | 0.13      | -0.11             | 0.17      | 0.24     | 0.16      |
| Treatment * education       | -0.01                | 0.13      | 0.00     | 0.12      | 0.08              | 0.17      | -0.03    | 0.15      |
| 6. Employed full time       | -0.10                | 0.14      | 0.11     | 0.11      | -0.20             | 0.17      | 0.34*    | 0.15      |
| Treatment * employed        | 0.07                 | 0.13      | 0.13     | 0.11      | 0.18              | 0.17      | 0.21     | 0.15      |
| 7. Double depression        | -0.40                | 0.23      | -0.13    | 0.17      | n/a               | n/a       | -0.35    | 0.26      |
| Treatment * double depress. | n/a                  | n/a       | n/a      | n/a       | n/a               | n/a       | n/a      | n/a       |
| 8. Comorbid diagnosis       | -0.10                | 0.14      | -0.03    | 0.12      | -0.08             | 0.17      | -0.02    | 0.15      |
| Treatment * comorbid        | 0.08                 | 0.13      | -0.04    | 0.12      | -0.01             | 0.17      | -0.02    | 0.14      |
| 9. Pre-treatment HAM-D      | 0.28*                | 0.12      | 0.09     | 0.11      | -0.20             | 0.16      | -0.01    | 0.14      |
| Treatment * HAM-D           | 0.05                 | 0.12      | 0.06     | 0.11      | 0.15              | 0.15      | 0.13     | 0.13      |
| 10. Pre-treatment BDI       | 0.09                 | 0.15      | 0.06     | 0.10      | -0.07             | 0.18      | -0.38*   | 0.14      |
| Treatment * BDI             | -0.03                | 0.16      | 0.05     | 0.11      | 0.06              | 0.18      | -0.05    | 0.14      |

*Note.* Estimates derived from multilevel logistic regression models adjusting for the random effect of study. Analyses included multiple imputation of missing HAM-D (Hamilton Rating Scale for Depression) and BDI (Beck Depression Inventory-II) scores. Models 2-10 include an intercept and the main effect of treatment (cognitive behavioral therapy versus pharmacotherapy), which are not shown. Superior improvement is  $\geq 95\%$  reduction in HAM-D or BDI scores from pre- to post-treatment. Superior response is post-treatment HAM-D or BDI = 0. Tabled coefficients reflect standardization of predictor variables ( $M=0$ ,  $SD=1$ ) before analysis to minimize collinearity between main effects and interactions. n/a = outcome events were too rare in some predictor categories and combinations for models to converge. \*  $p < .05$ , two-tailed.
